# Supplementary material for: A fluorescent sensor array based on three kinds of carbon dots for identification of hydroxybenzaldehyde and nitrobenzaldehyde isomers
Source: Royal Society of Chemistry journal article supplement (doi:10.1039/d2nj02610d), 2022-01-01
Supplement: d2nj02610d1.pdf [file d2nj02610d1.pdf]

**supplementary information**

**Fluorescence Sensor Array based on three kinds of Carbon Dots for Identification of Hydroxybenzaldehyde and Nitrobenzaldehyde Isomers**

Jinfa Yu<sup>a</sup>, and Xiangying Sun<sup>a, \*</sup>

<sup>a, \*</sup> College of Materials Science and Engineering, Huaqiao University, Key Laboratory of Molecular Designing and Green Conversions, Fujian University, Xiamen 361021, China;

\*Corresponding Author. Email: sunxy@hqu.edu.cn

|                        |           |
|------------------------|-----------|
| <b>Table S1</b> .....  | <b>S2</b> |
| <b>Table S2</b> .....  | <b>S2</b> |
| <b>Table S3</b> .....  | <b>S3</b> |
| <b>Figure S1</b> ..... | <b>S3</b> |
| <b>Figure S2</b> ..... | <b>S4</b> |
| <b>Figure S3</b> ..... | <b>S5</b> |
| <b>Figure S4</b> ..... | <b>S5</b> |
| <b>Figure S5</b> ..... | <b>S5</b> |
| <b>Figure S6</b> ..... | <b>S6</b> |
| <b>Figure S7</b> ..... | <b>S6</b> |
| <b>Figure S8</b> ..... | <b>S6</b> |

## 1. Sensing performance

Table S1 Detection limit of CDs-1 for HNBIs

| CDs-1                            | Linear Range( $\mu\text{M}$ ) | Linear Equation                                       | R-Square | Detection Limit ( $\mu\text{M}$ ) |
|----------------------------------|-------------------------------|-------------------------------------------------------|----------|-----------------------------------|
| 1. <i>o</i> -hydroxybenzaldehyde | 10.0-300.0                    | $(F_0-F)/F_0 = 2230.0 \times C1(\mu\text{M}) + 0.138$ | 0.963    | 3.2                               |
| 2. <i>m</i> -hydroxybenzaldehyde | 50.0-600.0                    | $(F_0-F)/F_0 = 1060.0 \times C2(\mu\text{M}) + 0.031$ | 0.969    | 6.8                               |
| 3. <i>p</i> -hydroxybenzaldehyde | 10.0-200.0                    | $(F_0-F)/F_0 = 6280.0 \times C3(\mu\text{M}) + 0.136$ | 0.942    | 12.0                              |
| 4. <i>o</i> -nitrobenzaldehyde   | 50.0-600.0                    | $(F_0-F)/F_0 = 1010.0 \times C4(\mu\text{M}) + 0.038$ | 0.973    | 7.1                               |
| 5. <i>m</i> -nitrobenzaldehyde   | 100.0-600.0                   | $(F_0-F)/F_0 = 2550.0 \times C5(\mu\text{M}) + 0.091$ | 0.966    | 9.1                               |
| 6. <i>p</i> -nitrobenzaldehyde   | 50.0-600.0                    | $(F_0-F)/F_0 = 790.0 \times C6(\mu\text{M}) - 0.020$  | 0.989    | 2.8                               |

Table S2 Detection limit of CDs-2 for HNBIs

| CDs-2                            | Linear Range( $\mu\text{M}$ ) | Linear Equation                                       | R-Square | Detection Limit ( $\mu\text{M}$ ) |
|----------------------------------|-------------------------------|-------------------------------------------------------|----------|-----------------------------------|
| 1. <i>o</i> -hydroxybenzaldehyde | 50.0-600.0                    | $(F_0-F)/F_0 = 859.0 \times C1(\mu\text{M}) + 0.315$  | 0.976    | 13.0                              |
| 2. <i>m</i> -hydroxybenzaldehyde | 50.0-600.0                    | $(F_0-F)/F_0 = 1034.0 \times C2(\mu\text{M}) + 0.100$ | 0.955    | 10.0                              |
| 3. <i>p</i> -hydroxybenzaldehyde | 20.0-300.0                    | $(F_0-F)/F_0 = 2270.0 \times C3(\mu\text{M}) + 0.263$ | 0.921    | 5.0                               |
| 4. <i>o</i> -nitrobenzaldehyde   | 100.0-600.0                   | $(F_0-F)/F_0 = 1099.0 \times C4(\mu\text{M}) + 0.135$ | 0.941    | 10.0                              |
| 5. <i>m</i> -nitrobenzaldehyde   | 50.0-500.0                    | $(F_0-F)/F_0 = 1140.0 \times C5(\mu\text{M}) + 0.120$ | 0.958    | 9.9                               |
| 6. <i>p</i> -nitrobenzaldehyde   | 20.0-300.0                    | $(F_0-F)/F_0 = 2383.0 \times C6(\mu\text{M}) - 0.020$ | 0.988    | 4.8                               |

Table S3 Detection limit of CDs-3 for HNBI

| CDs-3                    | Linear Range( $\mu\text{M}$ ) | Linear Equation                                        | R-Square | Detection Limit ( $\mu\text{M}$ ) |
|--------------------------|-------------------------------|--------------------------------------------------------|----------|-----------------------------------|
| 1. o-hydroxybenzaldehyde | 100.0-600.0                   | $(F_0-F)/F_0 = 978.0 \times C_1(\mu\text{M}) + 0.120$  | 0.960    | 9.3                               |
| 2. m-hydroxybenzaldehyde | 100.0-600.0                   | $(F_0-F)/F_0 = 935.0 \times C_2(\mu\text{M}) + 0.273$  | 0.976    | 9.7                               |
| 3. p-hydroxybenzaldehyde | 10.0-100.0                    | $(F_0-I)/F_0 = 930.0 \times C_3(\mu\text{M}) + 0.088$  | 0.930    | 9.8                               |
| 4. o-nitrobenzaldehyde   | 50.0-300.0                    | $(F_0-F)/F_0 = 1920.0 \times C_4(\mu\text{M}) + 0.058$ | 0.996    | 4.7                               |
| 5. m-nitrobenzaldehyde   | 50.0-300.0                    | $(F_0-F)/F_0 = 1502.0 \times C_5(\mu\text{M}) + 0.015$ | 0.998    | 6.1                               |
| 6. p-nitrobenzaldehyde   | 10.0-200.0                    | $(F_0-F)/F_0 = 3289.0 \times C_6(\mu\text{M}) + 0.228$ | 0.939    | 2.8                               |

## 2. Sensor array construction

### 2.1 Stability of the sensing system

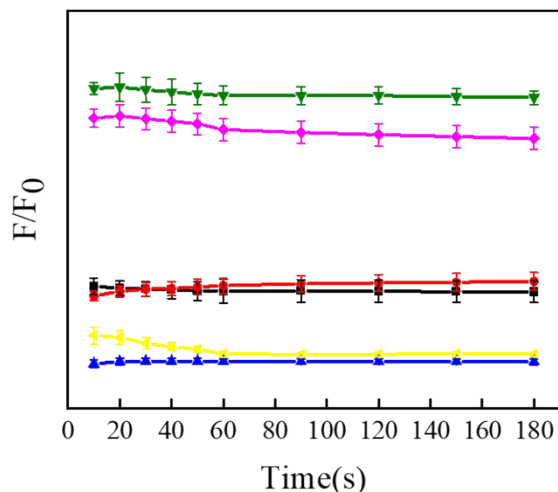

■ - OHB    
 ● - MHB    
 ▲ - PHB    
 ▼ - ONB    
 ◆ - MNB    
 ◀ - ONB

## 2.2 TEM images of CDs

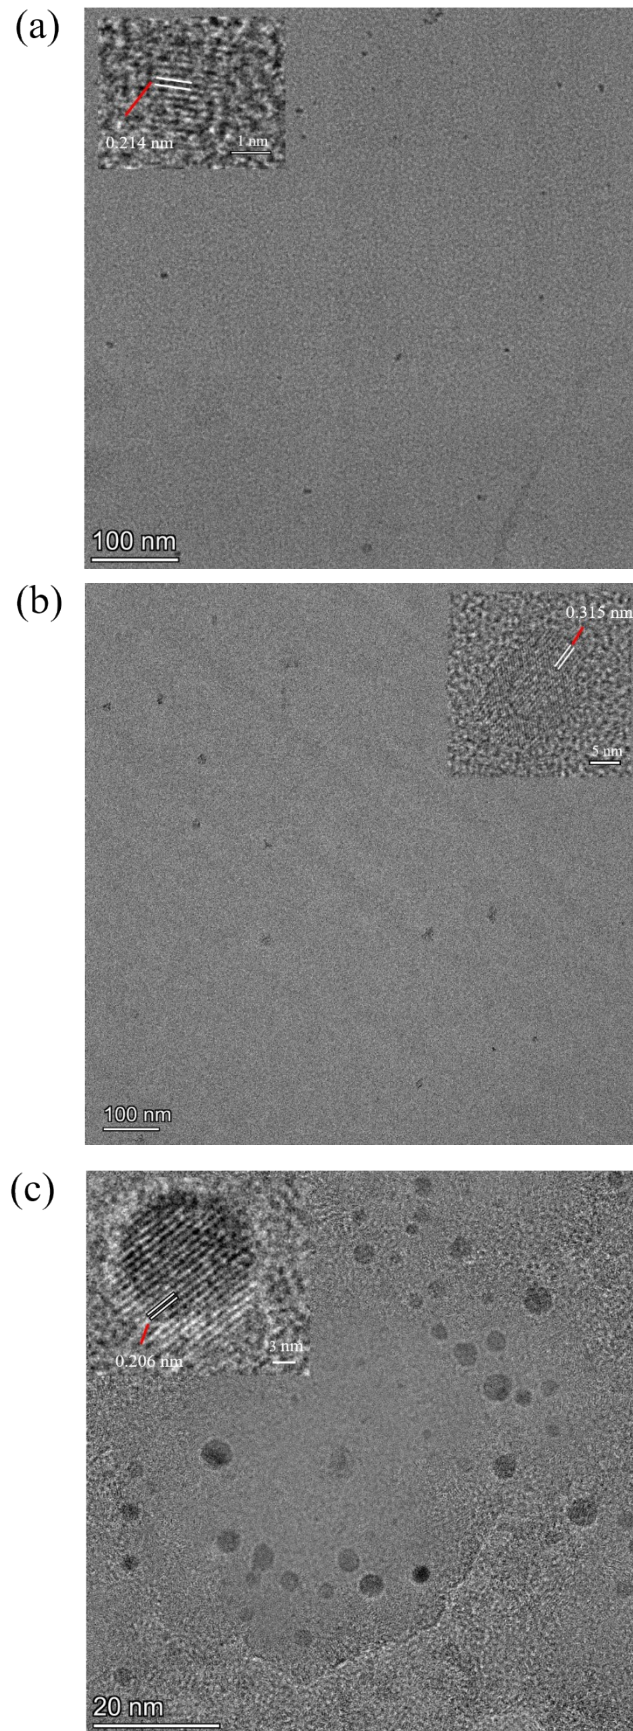

Figure S2 TEM images of (a) CDs-1, (b) CDs-2 and (c) CDs-3

### 2.3 FT-IR spectra of CDs-1, CDs-2 and CDs-3

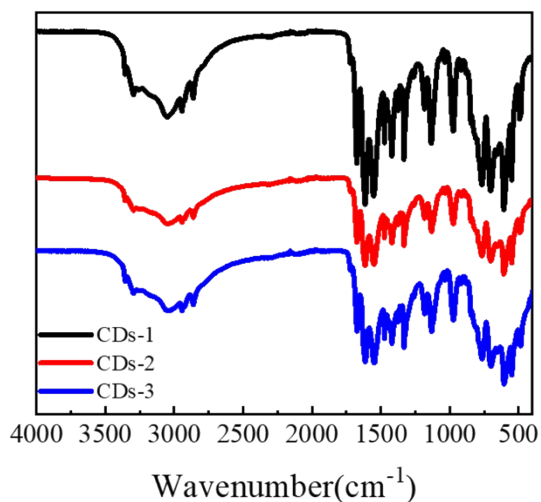

Figure S3 The FT-IR spectra of CDs-1, CDs-2 and CDs-3

### 2.4 UV-vis spectra of CDs-1, CDs-2, CDs-3

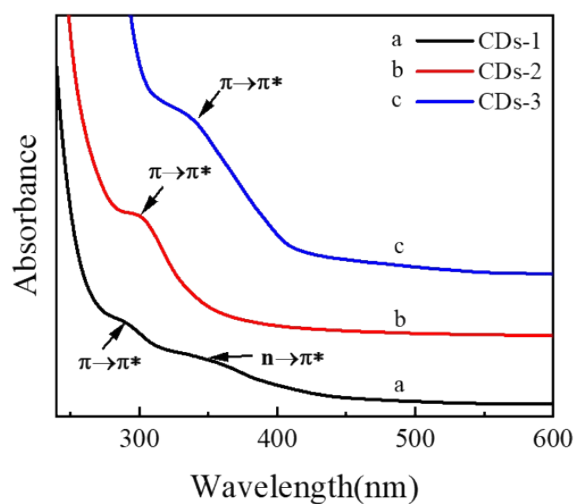

Figure S4 UV-vis spectra of CDs

### 2.5 The fluorescence spectra of CDs-1, CDs-2 and CDs-3

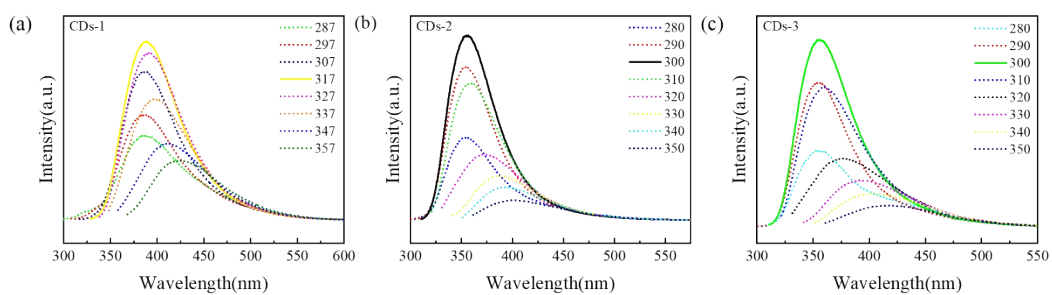

Figure S5 The fluorescence spectra of CDs-1, CDs-2 and CDs-3 under different excitation wavelengths

## 2.6 UV-vis spectra of CDs-1 with ONB

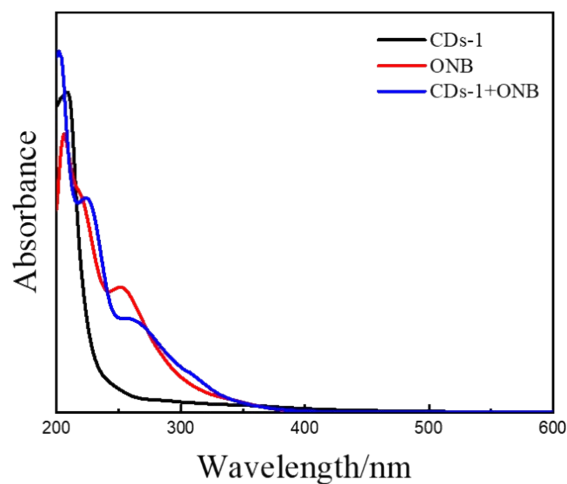

Figure S6 UV-vis spectra of CDs-1 with ONB

## 2.7 Fluorescence lifetime results

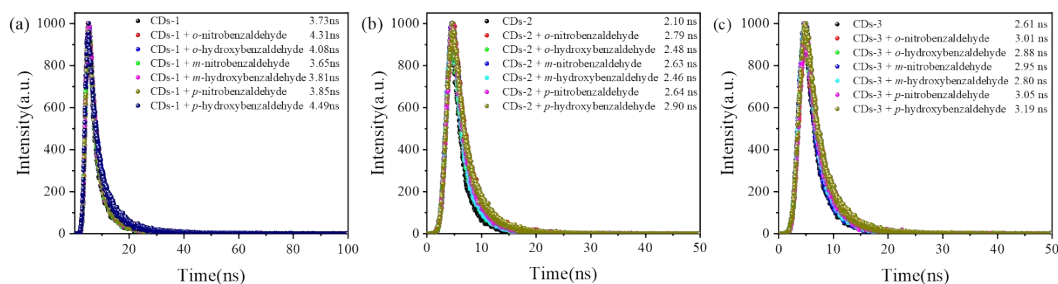

Figure S7 The fluorescence lifetime of CDs before and after adding six kinds of hydroxybenzaldehyde and nitrobenzaldehyde isomers respectively

## 2.8 Scatter plot of benzaldehyde derivative isomers at different concentrations

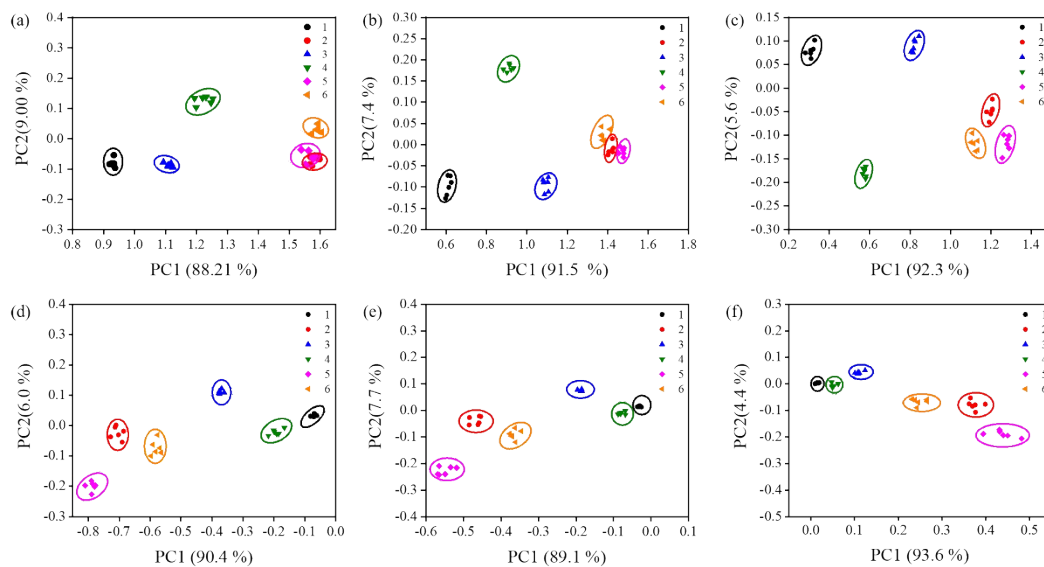

Figure S8 Scatter plot of hydroxybenzaldehyde and nitrobenzaldehyde isomers generated by PCA. (a) 0.05 mM; (b) 0.1 mM; (c) 0.2 mM; (d) 0.5 mM; (e) 0.8 mM; (f) 1 mM (1: PNB; 2: MNB; 3: ONB; 4: PHB; 5: MHB 6: OHB)
